# Supplementary material
Source: Springer Nature journal article supplement (https://www.springermedizin.de/resource/supplementary/12877_2014_1066_MOESM1_ESM.pdf/9440746)
Supplement: MOESM1 [file 9440746]

---

**Additional file 1. Predictors of regular dizziness in an older community population at 7- and 10-year follow-up – Additional analysis: *without* 'history of dizziness' as potential predictor**

---

|                                                       | <b>B</b> | <b>SE</b> | <b>Wald</b> | <b>OR</b> | <b>95% CI</b> | <b>P value</b> |
|-------------------------------------------------------|----------|-----------|-------------|-----------|---------------|----------------|
| <b>Characteristic</b>                                 |          |           |             |           |               |                |
| <i>7-year follow-up</i> <sup>a</sup>                  |          |           |             |           |               |                |
| Years of education                                    | -0.066   | 0.036     | 3.3         | 0.94      | 0.9-1.0       | 0.069          |
| Living alone                                          | 0.422    | 0.223     | 3.6         | 1.5       | 0.9-2.4       | 0.058          |
| History of osteo/rheumatoid arthritis                 | 0.762    | 0.233     | 10.7        | 2.1       | 1.4-3.4       | 0.001          |
| Use of nitrates                                       | 0.879    | 0.342     | 6.6         | 2.4       | 1.2-4.7       | 0.010          |
| Presence of anxiety or depression                     | 0.735    | 0.247     | 8.9         | 2.1       | 1.3-3.4       | 0.003          |
| Impaired vision                                       | 0.698    | 0.245     | 8.1         | 2.0       | 1.2-3.2       | 0.004          |
| Impaired function of lower extremities (chair stands) | 0.704    | 0.222     | 10.0        | 2.0       | 1.3-3.1       | 0.002          |
| <i>10-year follow-up</i> <sup>b</sup>                 |          |           |             |           |               |                |
| Living alone                                          | 0.466    | 0.269     | 3.0         | 1.6       | 0.9-2.7       | 0.083          |
| History of cancer                                     | 0.568    | 0.348     | 2.7         | 1.8       | 0.9-3.5       | 0.103          |
| Use of anxiolytics                                    | 0.902    | 0.453     | 4.0         | 2.5       | 1.0-6.0       | 0.046          |
| Impaired vision                                       | 0.497    | 0.314     | 2.5         | 1.6       | 0.9-3.0       | 0.114          |
| Impaired function of lower extremities (chair stands) | 0.894    | 0.271     | 10.9        | 2.4       | 1.5-4.2       | 0.001          |

---

CI: Confidence Interval; OR: Odds Ratio; SE: Standard Error.

\*: Multivariable logistic regression analysis, using backward elimination (Wald test) with a *P* value of 0.157 used for removal.

<sup>a</sup>: AUC 0.75 [0.70-0.80].

<sup>b</sup>: AUC 0.68 [0.61-0.75].
